# Supplementary material
Source: PubMed Central journal article supplement (PMC3371135)
Supplement: NIHMS376991-supplement-1_si_001.pdf [file NIHMS376991-supplement-1_si_001.pdf]

# Supporting Information

## **Quantitative separation of monomeric U(IV) from UO<sub>2</sub> in products of U(VI) reduction**

Daniel S. Alessi<sup>1</sup>, Benjamin Uster<sup>1</sup>, Harish Veeramani<sup>1,†</sup>, Elena I. Suvorova<sup>1</sup>, Juan S. Lezama-Pacheco<sup>2</sup>, Joanne E. Stubbs<sup>2,§</sup>, John R. Bargar<sup>2</sup>, Rizlan Bernier-Latmani<sup>1,\*</sup>

<sup>1</sup>Environmental Microbiology Laboratory, Ecole Polytechnique Fédérale de Lausanne, CH-1015, Switzerland

<sup>2</sup>Chemistry and Catalysis Division, SLAC National Accelerator Laboratory, Menlo Park, CA 94025, USA

<sup>†</sup>Current address: Environmental Nanoscience & Technology Laboratory, Department of Geosciences, Virginia Polytechnic and State University, Blacksburg, VA 24061, USA

<sup>§</sup>Current address: Center for Advanced Radiation Sources, University of Chicago, IL 60637, USA

\*Corresponding Author. Tel: +41 21 693 50 01, Email: rizlan.bernier-latmani@epfl.ch

36 Supporting Information Methods:

37 *Electron Microscopy*

38 Transmission electron microscopy (TEM) was used to probe a sample treated with  
39 the bicarbonate extraction for traces of remaining biogenic  $\text{UO}_2$  (sample Bio5 after  
40 bicarbonate extraction). The sample consisted primarily of monomeric U(IV) prior to  
41 extraction. After the extraction, the sample was centrifuged, the bicarbonate supernatant  
42 discarded, and the pellet washed repeatedly in deionized water. The pellet was then  
43 diluted to be 100 times more dilute than in the reduction and extraction experiments. A  
44 droplet of this suspension was placed in a spray apparatus, used to atomize the sample  
45 and mount it onto a standard carbon-coated copper grid (Quantifoil Micro Tools, GmbH,  
46 Jena, Germany) inside the anaerobic chamber. The rapid drying of the microdroplets  
47 formed by the spray apparatus prevented the formation of secondary crystals on the grids.  
48 Chemical information about the particles was collected using X-ray energy dispersive  
49 spectroscopy (EDS; INCA, Oxford). Images were recorded on a Gatan 797 slow scan  
50 CCD camera (1024 x 1024 pixels, 14 bits) and processed using Gatan Digital Micrograph  
51 3.11.0 software (Gatan, Inc., Pleasanton, CA, USA), including Fourier filtering. Phase  
52 identification was performed by analyzing SAED patterns and Fourier transforms of  
53 HRTEM images (diffractograms). Diffraction patterns and images were calculated using  
54 the Java Electron Microscopy Software (JEMS) (43) for the electron-optical parameters  
55 of the microscope used in the study, and the structural data of all known U oxides and  
56 phosphates were taken from the Inorganic Crystal Structure Database (ICSD, FIZ  
57 Karlsruhe, 2011) and compared with the experimental ones. Accuracy of phase

58 identification was within 1% of interplanar spacings. The intensities of reflections were  
59 always taken into account.

60

61 ***Reference***

62

63 (43) Stadelmann, P. A. EMS – A software package for electron-diffraction analysis and  
64 HREM image simulation in materials science. *Ultramicroscopy* **1987**, *21*, 131 – 145.

65

66

66  
67  
68  
69  
70  
71  
72  
73  
74  
75

Supporting Information Figure 1: EXAFS data (left panel) and Fourier transforms of the same (right panel) for the following samples: A – Bio1 pre-extraction; B – Bio1 post-extraction; C – Bio3 pre-extraction; D – Bio3 post-extraction; E – Bio5 pre-extraction; F – vivianite pre-extraction; G – magnetite pre-extraction; H – magnetite post-extraction; I – RABS sediment pre-extraction. Dashed lines indicate linear combination fits (spectra A, C, D, G) and shell-by-shell fits for all other spectra (see also Supporting Information Table 2 and Supporting Information Figure 2). Fourier transforms were determined for the range  $3 < k < 10$ .

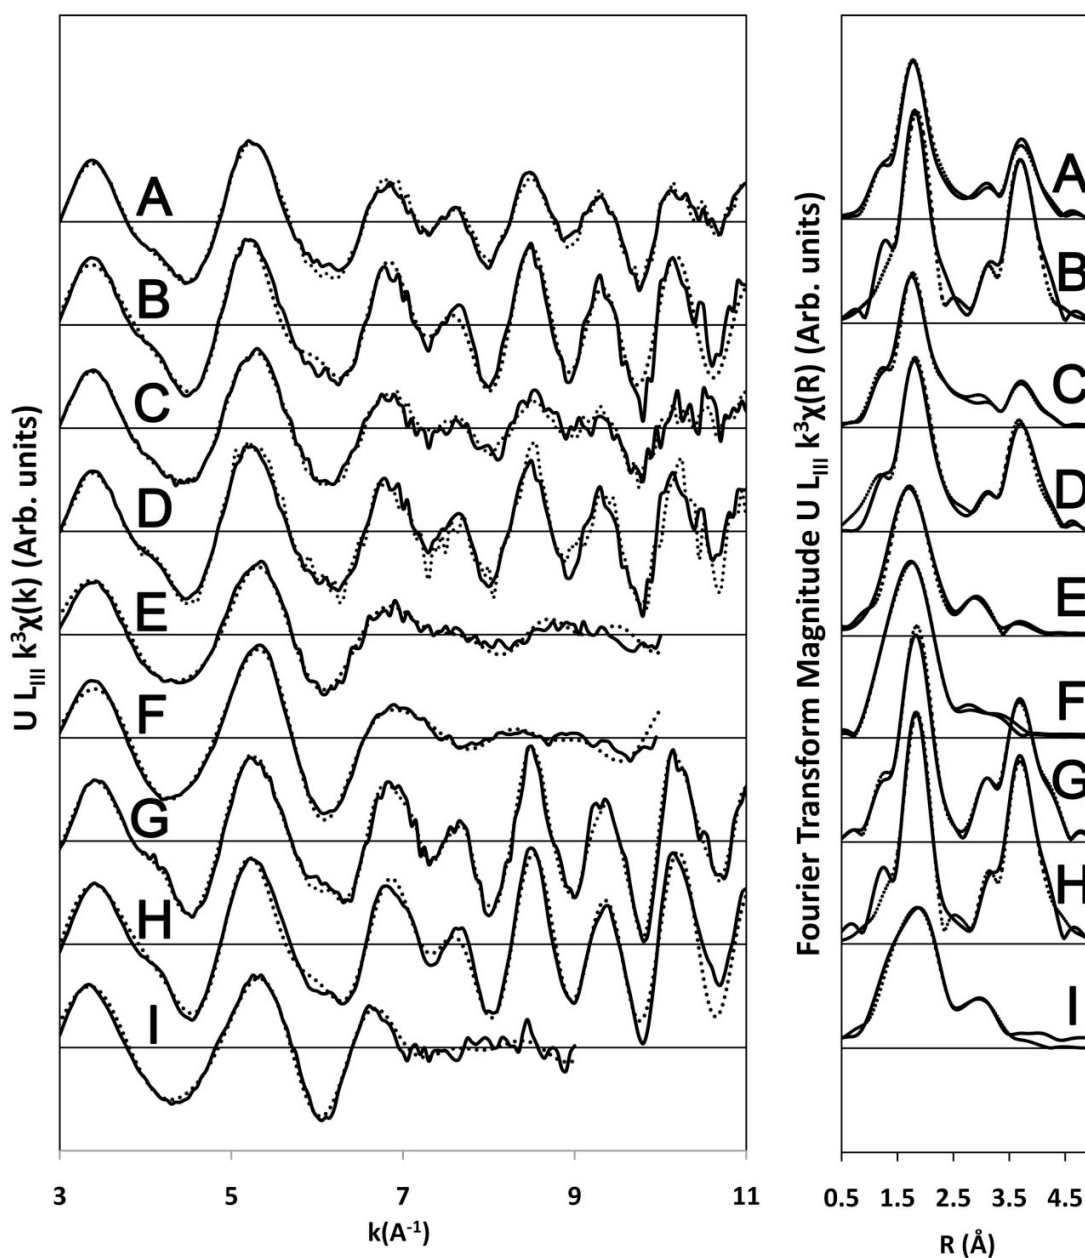

76

77

78 Supporting Information Figure 2: Shell-by-shell fits of samples B, E, F, H, and I (see

79 Supporting Information Figure 1), including the real part of the Fourier transform.

80 Fourier transforms were taken over the range  $3 < k < 10$ .

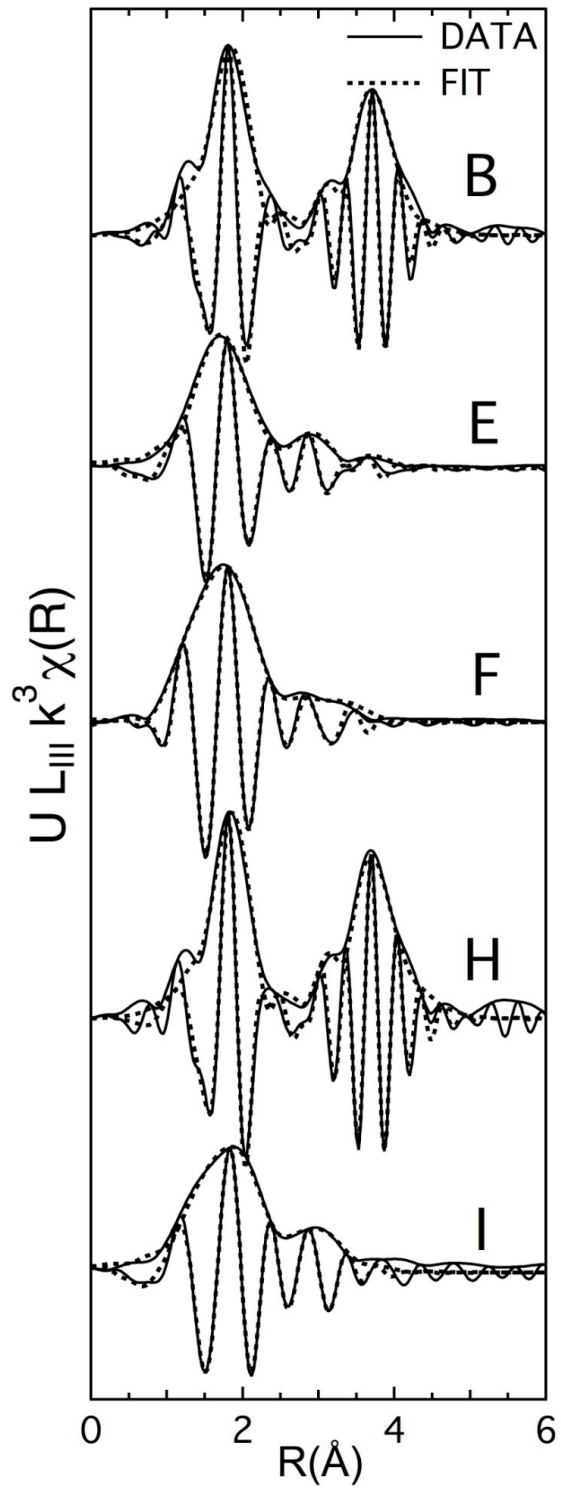

81

82

83

84

85 Supporting Information Table 1: Composition of Widell Low Phosphate (WLP) medium.

86 WLP is comprised of 1 mL of solutions B, C, and D, added to 1 L of solution A.

87

| <b>A</b>                |                         | <b>B</b>           |                         |
|-------------------------|-------------------------|--------------------|-------------------------|
| <b>Component</b>        | <b>g L<sup>-1</sup></b> | <b>Component</b>   | <b>g L<sup>-1</sup></b> |
| Calcium chloride        | 0.1                     | Hydrochloric acid  | 14.75                   |
| Potassium chloride      | 0.5                     | Ferrous sulfate    | 2.1                     |
| Monopotassium phosphate | 0.03                    | Boric acid         | 0.03                    |
| Magnesium chloride      | 0.5                     | Manganese chloride | 0.1                     |
| Sodium chloride         | 5.0                     | Cobalt chloride    | 0.19                    |
| Ammonium chloride       | 0.25                    | Nickel chloride    | 0.024                   |
| Sodium bicarbonate      | 3.7                     | Copper chloride    | 0.002                   |
| PIPES buffer            | 6.0                     | Zinc sulfate       | 0.144                   |
| Lactic acid             | 1.8                     | Sodium molybdate   | 0.036                   |
| Yeast Extract           | 0.5                     |                    |                         |

  

| <b>C</b>                   |                         | <b>D</b>         |                         |
|----------------------------|-------------------------|------------------|-------------------------|
| <b>Component</b>           | <b>g L<sup>-1</sup></b> | <b>Component</b> | <b>g L<sup>-1</sup></b> |
| 4-aminobenzoic acid        | 0.04                    | Sodium hydroxide | 0.4                     |
| D(+)-biotin                | 0.01                    | Sodium tungstate | 0.008                   |
| Nicotinic acid             | 0.1                     | Selenious acid   | 0.0025                  |
| Calcium D(+) pantothenate  | 0.05                    |                  |                         |
| Pyrodoxine dihydrochloride | 0.15                    |                  |                         |

88

89

90

91

92

93

94

95

96

97 Supporting Information Table 2: U L<sub>III</sub>-edge EXAFS fits for spectra B, E, F, H, and I  
 98 (see Supporting Information Figure 2).

|            |                              | B         | E        | F**         | H         | I       |
|------------|------------------------------|-----------|----------|-------------|-----------|---------|
| <i>U-O</i> | <i>N</i>                     | 7.6±0.9   | 3.8±1.6  | 4.5*        | 7.0±0.7   | 3.6±0.9 |
|            | <i>D</i> (Å)                 | 2.36(1)   | 2.24(7)  | 2.25(3)     | 2.35(1)   | 2.21(4) |
|            | $\sigma^2$ (Å <sup>2</sup> ) | 0.010(2)  | 0.005*   | 0.005*      | 0.009(2)  | 0.005*  |
| <i>U-O</i> |                              |           | 3.9±1.0  | 2.7*        |           | 7.0±1.0 |
|            |                              |           | 2.41(8)  | 2.49(4)     |           | 2.40(3) |
|            |                              |           | 0.006*   | 0.006*      |           | 0.008*  |
| <i>U-P</i> |                              |           | 1.2±0.5  | 1.8±0.9     |           | 2.0±0.4 |
|            |                              |           | 3.12(6)  | 3.15(4)     |           | 3.12(3) |
|            |                              |           | 0.008*   | 0.008(6)    |           | 0.008*  |
| <i>U-P</i> |                              |           | 2.4±1.0  | 2.7±0.9     |           | 4.0±0.8 |
|            |                              |           | 3.65(8)  | 3.77(4)     |           | 3.66(4) |
|            |                              |           | 0.009*   | §§0.009(12) |           | 0.009*  |
| <i>U-U</i> |                              | 9.3±1.7   | 1.2±1.1  |             | 11.3±1.3  |         |
|            |                              | 3.85(2)   | 3.73(10) |             | 3.85(2)   |         |
|            |                              | 0.007*    | 0.007*   |             | 0.007*    |         |
| <i>U-O</i> |                              | §22.8±2.7 |          |             | §20.9±2.1 |         |
|            |                              | 4.46(3)   |          |             | 4.46(2)   |         |
|            |                              | 0.017(9)  |          |             | 0.009(4)  |         |

99 \*Fixed values  
 100 \*\*Contribution ~15-30% (from XANES) of U(VI)-O~1.75 Å with multiple scattering  
 101 included in the model for this sample  
 102 §Constrained value to coordination in UO<sub>2</sub> (3 times coordination of first U-O shell), ,  
 103 error was propagated accordingly  
 104 §§Constrained value  $\sigma^2_{U-P1} = \sigma^2_{U-P1} + 0.001$ , error was propagated accordingly  
 105  
 106
